# Supplementary material for: Optical field coupling in ZnO nanorods decorated with silver plasmonic nanoparticles
Source: Royal Society of Chemistry journal article supplement (doi:10.1039/d1tc03032a), 2021-01-01
Supplement: d1tc03032a1.pdf [file d1tc03032a1.pdf]

## Supporting Information

### Optical Field Coupling in ZnO Nanorods Decorated with Silver Plasmonic Nanoparticles

*Shujie You,<sup>1,†</sup> Mojtaba Gilzad Kohan,<sup>1,†</sup> Andrea Camellini,<sup>2,†</sup> Isabella Concina,<sup>1\*</sup> Margherita Zavelani Rossi,<sup>2,3\*</sup> Alberto Vomiero<sup>1,4\*</sup>*

<sup>1</sup> Division of Materials Science, Department of Engineering Sciences and Mathematics, Luleå University of Technology, 97187 Luleå, Sweden.

<sup>2</sup> Dipartimento di Energia, Politecnico di Milano, Via G. Ponzio 34/3, Milano I-20133, Italy.

<sup>3</sup> IFN-CNR, piazza L. Da Vinci 32, 20133 Milano, Italy.

<sup>4</sup> Department of Molecular Sciences and Nanosystems, Ca' Foscari University of Venice, Via Torino 155, 30172 Venezia Mestre, Italy.

†: These authors contributed equally to the work

E-mail: Isabella.concina@ltu.se; margherita.zavelani@polimi.it ; alberto.vomiero@ltu.se ; alberto.vomiero@unive.it

Keywords: Plasmonic nanoparticles, Zinc Oxide Nanorods, transient pump-probe spectroscopy, radiative and non-radiative plasmonic decoupling.

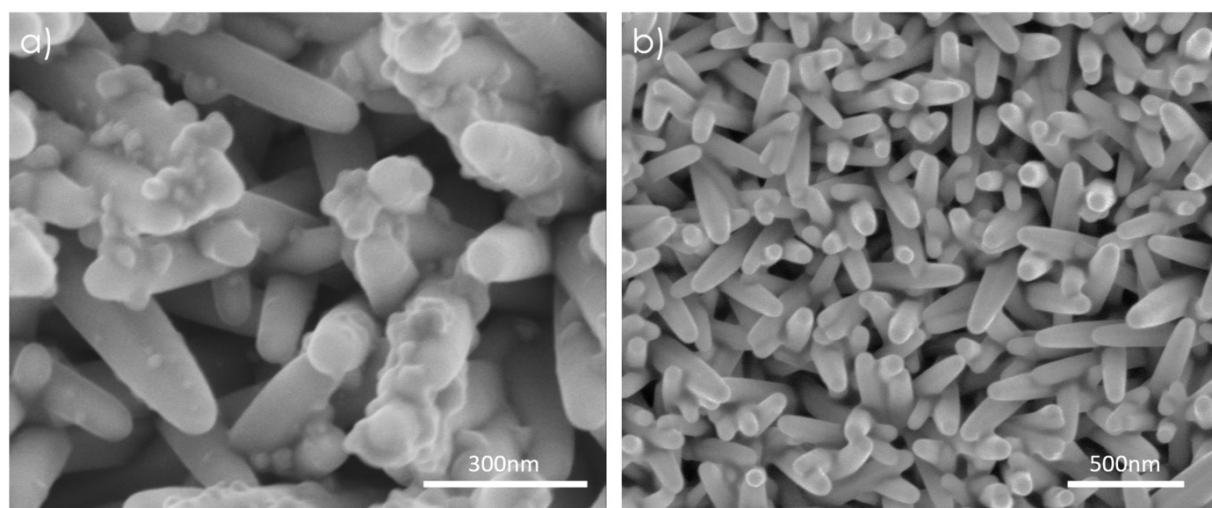

**Figure S 1:** (a) SEM image of the ZnO NRs/Al<sub>2</sub>O<sub>3</sub>/Ag NPs sample. Slight aggregation of the Ag NPs is observable. (b) ZnO NRs after deposition of 4 nm Al<sub>2</sub>O<sub>3</sub>. The original architecture of the NRs was preserved after Al<sub>2</sub>O<sub>3</sub> deposition.

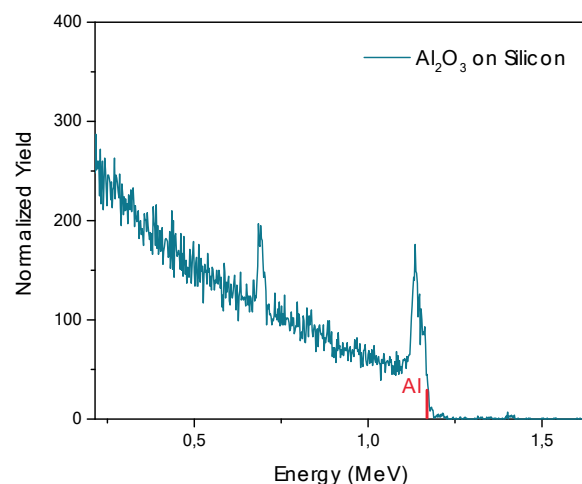

**Figure S 2:** Rutherford Backscattering spectra of the  $\text{Al}_2\text{O}_3$  film deposited on silicon substrate.

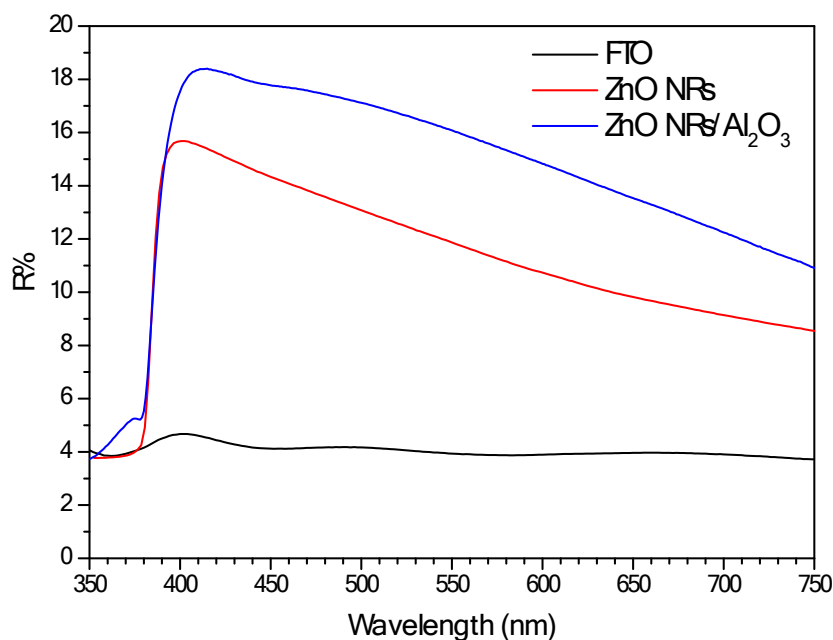

**Figure S 3:** Diffused reflectance spectroscopy of the ZnO NRs after  $\text{Al}_2\text{O}_3$  deposition did not show any changes in the absorption edge of ZnO NRs.

**Table S 1:** Photoluminescence quantum yield (PL QY) of ZnO NRs samples before and after decorating with Ag NPs. The samples were excited with 325 nm UV light from Xe lamp. QY(tot) refers to the ratio of total sample emission vs. absorption. QY(DLE) presents the ratio of DLE emission (between 450 and 750 nm) vs. absorption. In order to avoid discrepancy and to actuate a

detailed comparison, the presented QY data in each column were conducted on the same ZnO NRs substrate before and after deposition of corresponding Ag NPs and/or Al<sub>2</sub>O<sub>3</sub> layer.

| Bare Sample      | ZnO                                | ZnO        | ZnO                                        |
|------------------|------------------------------------|------------|--------------------------------------------|
| QY(tot) %        | 1.2                                | 0.7        | 0.9                                        |
| QY(DLE) %        | 1.1                                | 0.6        | 0.8                                        |
| After deposition | ZnO/Al <sub>2</sub> O <sub>3</sub> | ZnO/Ag NPs | ZnO/Al <sub>2</sub> O <sub>3</sub> /Ag NPs |
| QY(tot) %        | 0.7                                | 0.5        | 0.6                                        |
| QY (DLE)%        | 0.6                                | 0.4        | 0.6                                        |
| QY(tot) %        | 1.2                                | 0.7        | 0.9                                        |

The PL QY is calculated according to following equation:  $\eta = \frac{E_s}{S_E - S_s}$

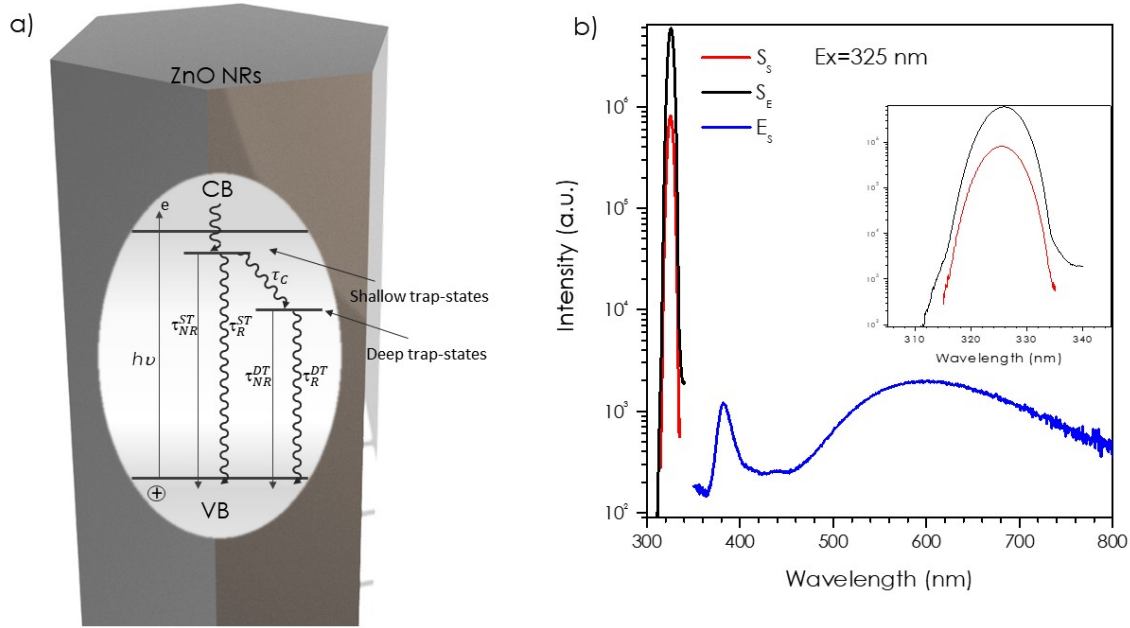

**Figure S 4:** (a) Two-state trapping model consisting of shallow trap-states and deep trap-states of ZnO NRs. The terms  $\tau_R$  and  $\tau_{NR}$  corresponds to the radiative and non-radiative PL decay time-constants of the ZnO NRs. (b) A typical set of spectra for PL QY calculation. The spectra were recorded using FLS980 Edinburgh photometer equipped with integrating sphere.  $S_E$ ,  $S_s$  and  $E_s$

refer to the scattering of excitation light, scattering of sample and the emission from sample, respectively.

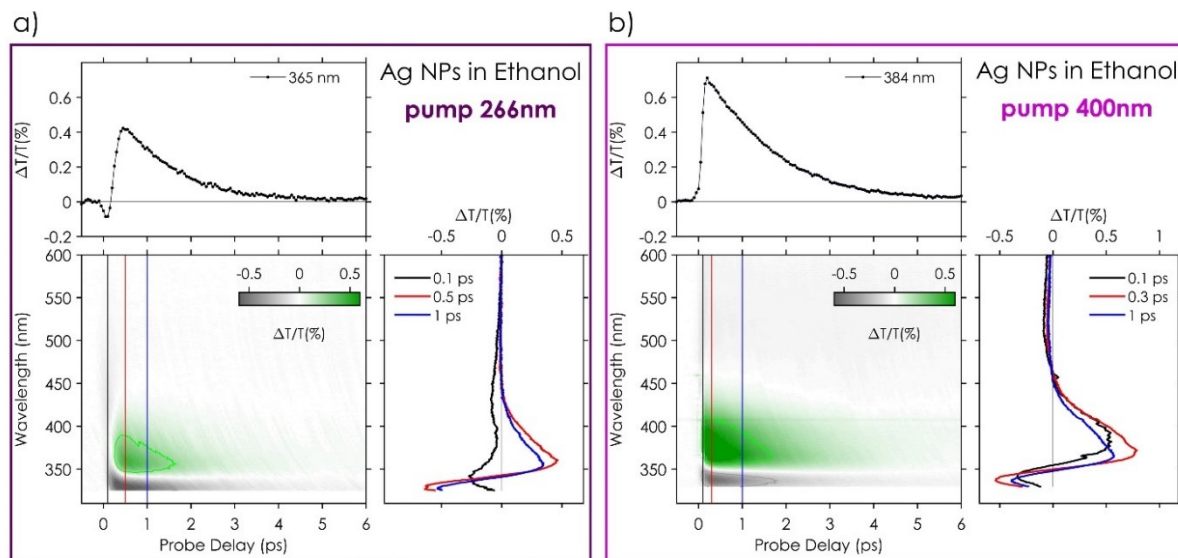

**Figure S 5:** Differential transmission  $\Delta T/T$  datasets of Ag NPs dissolved in ethanol obtained by pumping with (a) pump pulses centered at 266 nm close to Ag interband transition and (b) pump pulses centered at 400 nm close to Ag NPs *LSPR*. Positive  $\Delta T/T$  peak associated with Ag NPs *LSPR* transient response is reached within 500 fs for both pumping conditions (cf.  $\Delta T/T$  dynamic and red  $\Delta T/T$  spectra in top and right panels of (a) and (b)).

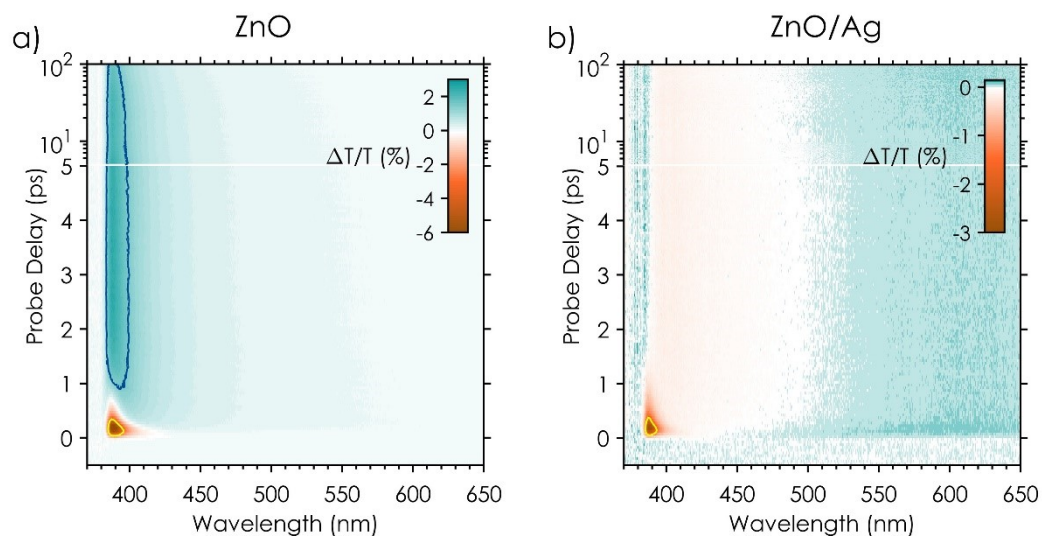

**Figure S 6:** Differential transmission  $\Delta T/T$  maps of (a) bare ZnO NRs and (b) ZnO/Ag. Yellow and blue contour lines correspond to surface levels at half value of the negative and positive peak values of the differential transmission datasets. Colorbar limits are adjusted to cover the full dynamic range of the  $\Delta T/T$  signals. Pump wavelength is 266 nm (i.e. 4.7 eV) and incident pump fluence is  $\sim 95 \mu\text{J cm}^{-2}$ .

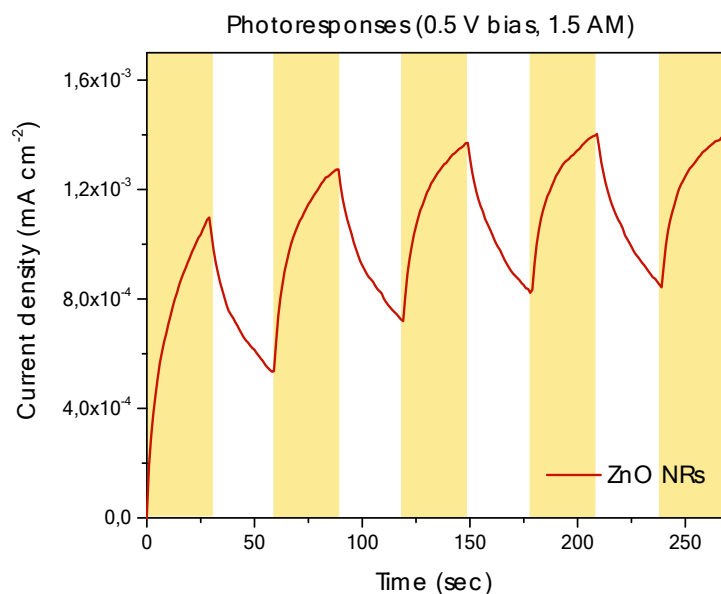

**Figure S 7:** Photoresponse of ZnO NRs to pulsed solar light (1.5 AM from solar simulator) illumination under 0.5 V forwarded potential.
